# Supplementary material for: Studying the efficacy of antiplatelet drugs on atherosclerosis by optofluidic imaging on a chip
Source: Royal Society of Chemistry journal article supplement (doi:10.1039/d2lc00895e), 2022-12-08
Supplement: d2lc00895e1.pdf [file d2lc00895e1.pdf]

## Supplementary information

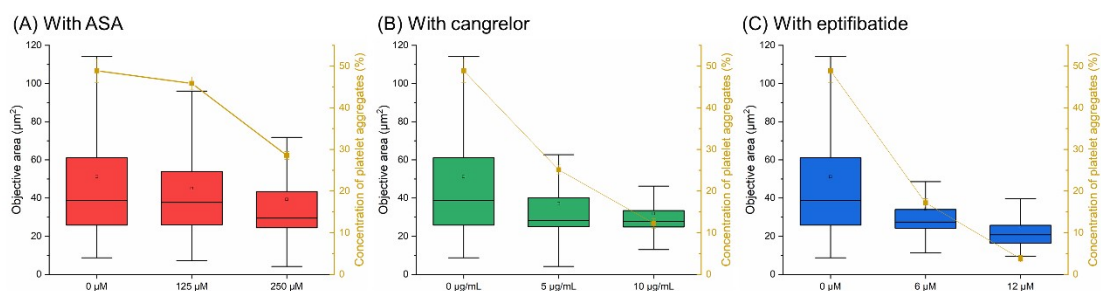

**Fig. S1** Effects of ASA (A), cangrelor (B), and eptifibatide (C) under stenosis (10-min perfusion). Left y-axis: the size distribution of single platelets and platelet aggregates. Right y-axis; the concentration of platelet aggregates.

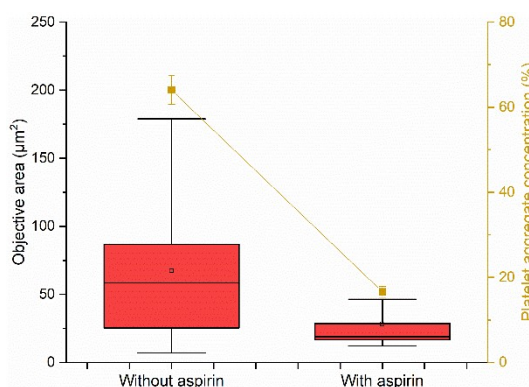

**Fig. S2** The effect of ASA on inhibiting AA-induced platelet aggregation, without ASA (left) and with ASA (right). Left y-axis: the size distribution of single platelets and platelet aggregates. Right y-axis; the concentration of platelet aggregates.

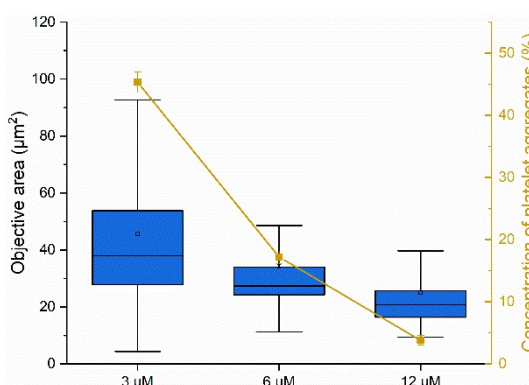

**Fig. S3** Dose relationship of eptifibatide on stenosis-induced platelet aggregation. Left y-axis: the size distribution of single platelets and platelet aggregates. Right y-axis; the concentration of platelet aggregates.
